# Supplementary material for: Validity evidence for using the Situational Motivation Scale to assess pre-clerkship medical student motivation.
Source: Preprints.org preprint supplement (doi:10.20944/preprints202405.1525.v1), 2024-05-23
Supplement: Supplementary file 1 [file supplementary]

**Appendix D: Confirmatory Factor Analysis (CFA) Diagrams**

**Figure D1**: CFA diagram for the *Post-Situational* context.

**Figure D2**: CFA diagram for the *Short-Term* context.
